# Supplementary material for: Okara Waste as a Substrate for the Microalgae Phaeodactylum tricornutum Enhances the Production of Algal Biomass, Fucoxanthin, and Polyunsaturated Fatty Acids
Source: MDPI journal article supplement (doi:10.3390/fermentation9010031), 2022-12-30
Supplement: s1 [file s1]

# Okara Waste as a Substrate for the Microalgae *Phaeodactylum tricornutum* Enhances the Production of Algal Biomass, Fucoxanthin, and Polyunsaturated Fatty Acids

Jaejung Kim <sup>1,†</sup>, Jaslyn Lee <sup>1,†</sup>, Amanda Ying Hui Voo <sup>1,2,†</sup>, Yong Xing Tan <sup>1</sup>, Wai Kit Mok <sup>1</sup>, Aaron Zongwei Li <sup>1,2</sup> and Wei Ning Chen <sup>1,\*</sup>

<sup>1</sup> School of Chemistry, Chemical Engineering and Biotechnology, College of Engineering, Nanyang Technological University, 62 Nanyang Drive, Singapore 637459, Singapore

<sup>2</sup> Interdisciplinary Graduate Programme, Nanyang Environmental and Water Research Institute, Nanyang Technological University, 62 Nanyang Drive, Singapore 637459, Singapore

\* Correspondence: wnchen@ntu.edu.sg

† These authors equally contributed to the work.

## Supplementary Figures

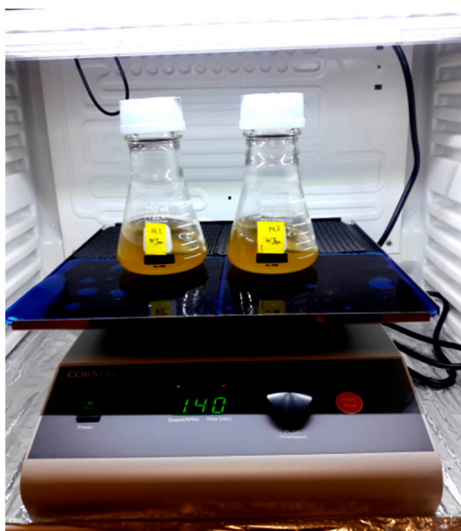

**Supplementary Figure S1.** Microalgae culture setup in a chilling incubator with white fluorescence light and an orbital shaker.

Artificial sea water

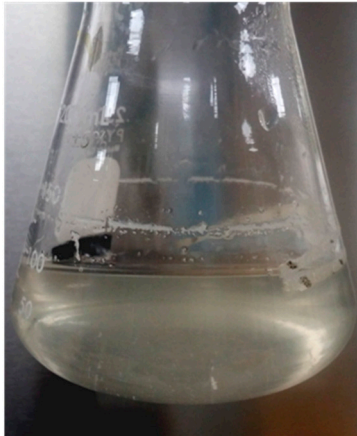

Unfermented okara

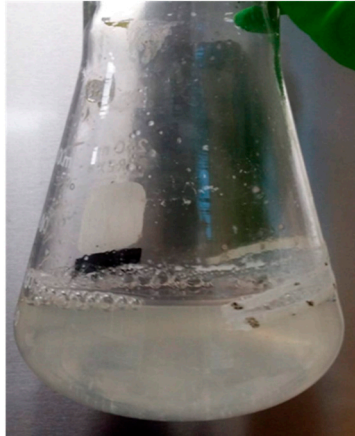

**Supplementary Figure S2.** Images of *P. tricornutum* grown in artificial seawater (left) and unfermented okara media (right).

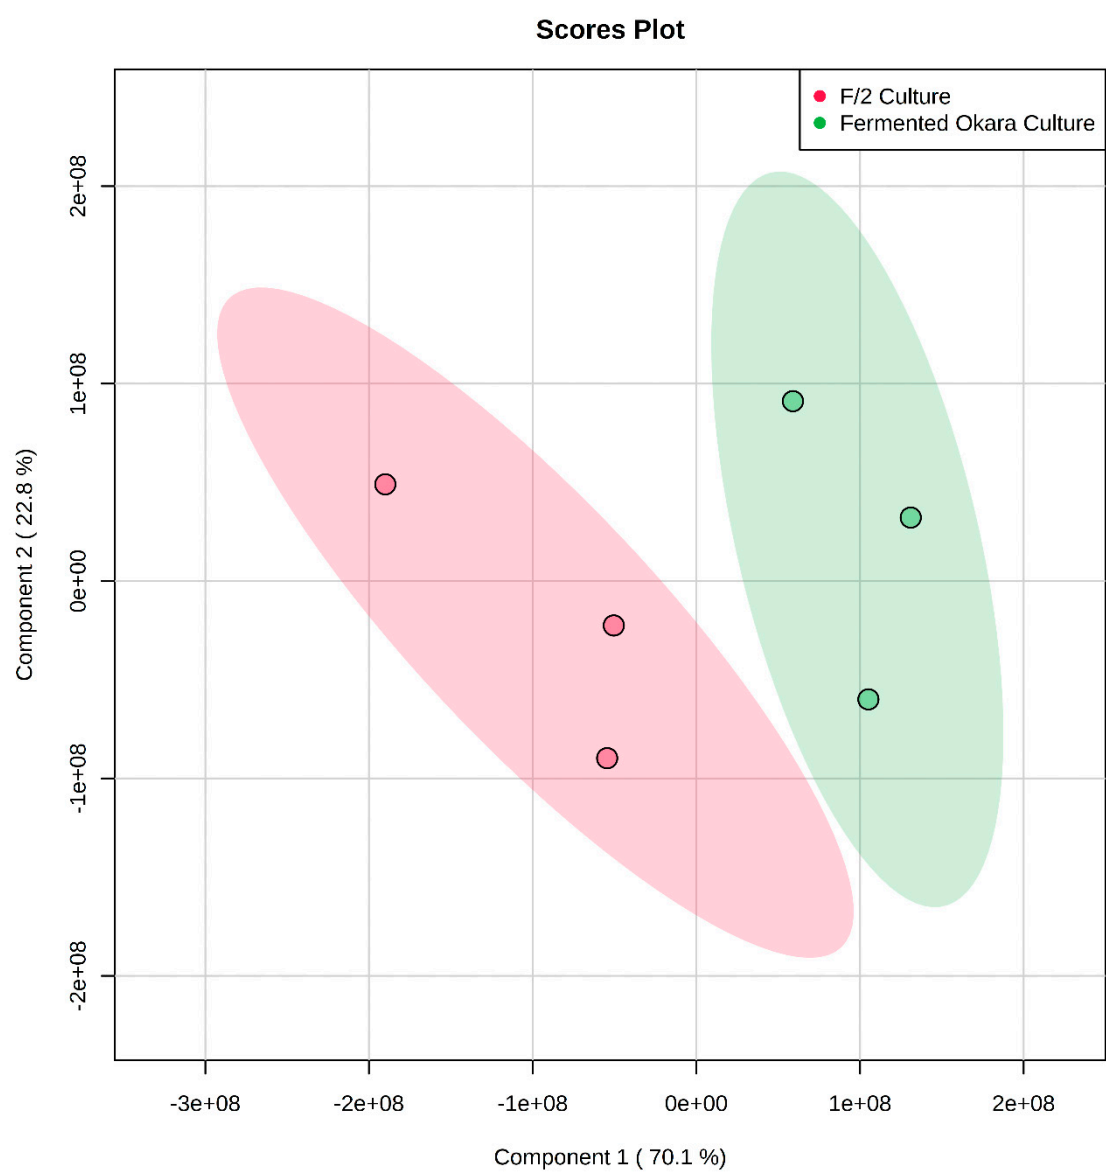

**Supplementary Figure S3.** Partial least square discriminate analysis of intracellular metabolites from fermented okara culture and F/2

## Supplementary Table

**Supplementary Table S1.** Components of F/2 media (G0154, Sigma)

| Component (mg/L)                       | G0154 |
|----------------------------------------|-------|
| Biotin                                 | 0.005 |
| Cobalt chloride • 6H <sub>2</sub> O    | 0.01  |
| Cupric sulfate • 5H <sub>2</sub> O     | 0.01  |
| EDTA disodium • 2H <sub>2</sub> O      | 4.36  |
| Ferric chloride • 6H <sub>2</sub> O    | 3.15  |
| Manganese chloride • 4H <sub>2</sub> O | 0.18  |
| Sodium molybdate • 2H <sub>2</sub> O   | 0.006 |
| Sodium nitrate                         | 75.0  |
| Sodium phosphate monobasic             | 4.411 |
| Thiamine • HCl                         | 0.1   |
| Vitamin B <sub>12</sub>                | 0.005 |
| Zinc sulfate • 7H <sub>2</sub> O       | 0.022 |

**Supplementary Table S2.** Metabolite quantitation of cells from fermented okara culture and F/2

| Metabolites       | Fermented Okara Culture | F/2                   | Fold Change |
|-------------------|-------------------------|-----------------------|-------------|
| L-Alanine         | 151117955 ± 40248104    | 55359717 ± 17274417   | 2.73        |
| L-Valine          | 20249132 ± 4739954      | 11174734 ± 1040699    | 1.81        |
| L-Leucine         | 13985044 ± 4426860      | N.D.                  | -           |
| L-Proline         | 366493174 ± 78788977    | 270164158 ± 107803147 | 1.36        |
| Succinic acid     | 12995910 ± 1736148      | N.D.                  | -           |
| Methyltyrosine    | 5268397 ± 930580        | 14552927 ± 5665727    | 0.36        |
| L-Serine          | 13187098 ± 306213       | 4498369 ± 1571415     | 2.93        |
| L-Threonine       | 21065286 ± 2717681      | 6169260 ± 1918788     | 3.41        |
| L-Aspartic Acid   | 21988273 ± 15688058     | N.D.                  | -           |
| L-Lysine          | 64648813 ± 40470104     | 14058399 ± 2779101    | 4.60        |
| L-Threonic Acid   | 3515504 ± 1704135       | 12633603 ± 1972932    | 1.48        |
| Phosphoric acid   | 11340906 ± 2055252      | N.D.                  | -           |
| Ketoglutaric acid | 9749749 ± 2509415       | N.D.                  | -           |
| D-Glucose         | 27849931 ± 7020191      | 57319747 ± 17733245   | 0.49        |
| D-Mannose         | 4573025 ± 1247440       | 10509429 ± 4330966    | 0.44        |
| Galactofuranose   | 11127298 ± 2356787      | 52582778 ± 4904629    | 0.21        |
| Inositol          | 3544007 ± 1276600       | 6452898 ± 717349      | 0.55        |
| Myo-Inositol      | 8220090 ± 2980639       | 19703952 ± 2499325    | 0.42        |
| Sedoheptulose     | 3777560 ± 2112451       | 107350452 ± 49800832  | 0.04        |
| D-Galactose       | 102550085 ± 27630901    | 58873733 ± 8781061    | 1.74        |
| Glucopyranose     | 3200496 ± 1889693       | 18556617 ± 7687305    | 0.17        |
| Propane           | 4579043 ± 1050385       | N.D.                  | -           |
| Glycine           | 21308777 ± 4261830      | 14367172 ± 4607780    | 1.27        |
| Malic acid        | 6054507 ± 1065589       | 4763921 ± 4060474     | 0.28        |

N.D. = Not Detected

**Supplementary Table S3.** Maximal growth rate and method of aeration from *P. tricornutum* in this study compared to previous literatures

| Species                                           | Maximal growth rate<br>(day <sup>-1</sup> ) | Method<br>of aeration | Reference  |
|---------------------------------------------------|---------------------------------------------|-----------------------|------------|
| <i>P. tricornutum</i><br>(f/2)                    | 0.38                                        | Orbital               | This study |
| <i>P. tricornutum</i><br>(fermented okara medium) | 0.48                                        | shaking               |            |
| <i>P. tricornutum</i>                             | <0.3                                        | 1% CO <sub>2</sub>    | [1]        |
| <i>P. tricornutum</i>                             | <0.2                                        | 1% CO <sub>2</sub>    | [2]        |
| <i>P. tricornutum</i>                             | 0.14                                        | Orbital               | [3]        |
|                                                   |                                             | shaking               |            |
| <i>P. tricornutum</i> (six strains)               | <0.35                                       | Unknown               | [4]        |

## Reference

1. Wang, H.; Zhang, Y.; Chen, L.; Cheng, W.; Liu, T. Combined Production of Fucoxanthin and EPA from Two Diatom Strains *Phaeodactylum Tricornutum* and *Cylindrotheca Fusiformis* Cultures. *Bioprocess Biosyst Eng* **2018**, *41* (7), 1061–1071. <https://doi.org/10.1007/s00449-018-1935-y>.
2. Gao, B.; Chen, A.; Zhang, W.; Li, A.; Zhang, C. Co-Production of Lipids, Eicosapentaenoic Acid, Fucoxanthin, and Chrysolaminarin by *Phaeodactylum Tricornutum* Cultured in a Flat-Plate Photobioreactor under Varying Nitrogen Conditions. *Journal of Ocean University of China* **2017**, *16* (5), 916–924. <https://doi.org/10.1007/s11802-017-3174-2>.
3. Yang, R.; Wei, D. Improving Fucoxanthin Production in Mixotrophic Culture of Marine Diatom *Phaeodactylum Tricornutum* by LED Light Shift and Nitrogen Supplementation. *Front Bioeng Biotechnol* **2020**, *8*. <https://doi.org/10.3389/fbioe.2020.00820>.
4. Wu, H.; Li, T.; Wang, G.; Dai, S.; He, H.; Xiang, W. A Comparative Analysis of Fatty Acid Composition and Fucoxanthin Content in Six *Phaeodactylum Tricornutum* Strains from Different Origins. *Chinese Journal of Oceanology and Limnology* **2016**, *34* (2), 391–398. <https://doi.org/10.1007/s00343-015-4325-1>.
